# Supplementary material
Source: Royal Society of Chemistry journal article supplement (https://www.rsc.org/suppdata/nj/1999/1231/904292jt1.doc)
Supplement: Supplementary file 1 [file 904292jt1.doc]

**Table S1.** Comparison of the X-ray geometry of compound **1** (bond lengths in Å and bond angles in ˚) with those of some pyrazole derivatives

N1–N2 N2–C3 C3–C4 C4–C5 C5–N1 C3–C8 C5–C9 N1N2C3 N2C3C4 C3C4C5 C4C5N1 C5N1N2 N2C3C8 N1C5C9

**1** (this work) *a* 1.348 1.351 1.391 1.387 1.348 1.483 1.482 107.1 110.3 104.0 109.2 109.4 120.1 120.8

BIXBUF101.361 1.347 1.384 1.376 1.340 1.484 1.477 105.1 113.9 101.5 111.1 108.4 122.2 117.5

CECKEA *b* 1.332 1.376 1.390 1.396 1.338 1.512 1.502 104.6 112.2 103.1 109.0 109.7 125.0 125.3

COHFIO *c* 1.412 1.431 1.426 1.443 1.407 1.445 1.411 106.2 110.6 104.1 110.4 108.5 122.6 119.8

RISMUB 1.351 1.385 1.388 1.356 1.357 1.460 1.444 104.8 111.1 106.3 108.1 109.6 127.0 120.4

TEMTEK *d* 1.357 1.357 1.376 1.382 1.334 1.497 1.495 106.5 108.8 104.3 111.4 109.0 124.7 120.3

TEMTIO *d* 1.355 1.356 1.388 1.364 1.320 1.496 1.487 106.5 109.0 103.9 111.7 109.0 124.4 120.9

TOMBEC *d* 1.363 1.361 1.368 1.385 1.351 1.485 1.495 105.4 108.5 105.1 111.2 109.8 125.4 124.4

ZAGSAB *d* 1.363 1.338 1.359 1.363 1.332 1.497 1.480 105.1 109.8 103.8 112.4 108.9 126.3 118.7

ZIJBOJ *d* 1.360 1.356 1.375 1.389 1.332 1.495 1.489 106.3 109.4 103.6 111.8 108.9 124.8 120.3

ZIJBUP *d* 1.353 1.354 1.364 1.389 1.334 1.491 1.484 106.1 109.1 104.1 111.3 109.3 123.9 120.4

ZIMMEQ *d* 1.356 1.356 1.376 1.387 1.337 1.489 1.485 106.4 109.2 104.0 111.4 109.0 124.7 120.1

ZOKFEK *d* 1.355 1.364 1.362 1.382 1.329 1.484 1.483 106.6 109.1 104.4 111.4 108.5 125.1 120.1

ZOKFIO *d* 1.359 1.357 1.362 1.386 1.333 1.501 1.492 106.7 109.6 103.9 111.8 108.8 124.5 120.7

ZOPTON *e* 1.356 1.335 1.358 1.370 1.333 1.492 1.460 106.6 109.6 104.7 110.5 108.5 122.1 122.5

ZOPTUT *f* 1.364 1.344 1.360 1.376 1.333 1.496 1.493 106.6 109.9 104.4 110.9 108.1 123.4 123.0

ZUSFIC *d* 1.365 1.358 1.358 1.384 1.328 1.488 1.483 106.4 109.8 104.1 111.6 108.1 124.1 120.1

ZUSFOI *e* 1.358 1.348 1.374 1.384 1.331 1.490 1.490 106.5 109.6 103.7 111.5 108.7 123.5 120.5

ZUVQIQ *d* 1.357 1.362 1.368 1.385 1.330 1.480 1.480 106.3 109.2 103.9 111.8 108.7 125.0 119.1

ZUVQUC *d* 1.372 1.373 1.374 1.396 1.346 1.492 1.485 106.1 108.7 104.8 111.2 109.1 124.3 120.6

ZUVRAJ *d* 1.359 1.355 1.367 1.384 1.331 1.487 1.486 105.7 108.9 104.1 111.9 109.4 125.0 122.4

ZUVREN *d* 1.360 1.354 1.369 1.384 1.328 1.489 1.482 105.8 108.9 104.1 111.9 109.3 123.8 120.3

ZUVRIR *d* 1.354 1.367 1.368 1.389 1.325 1.471 1.470 105.3 108.3 103.9 112.4 110.1 124.6 120.2

*a* Average values of the four independent molecules (see Table 1).

*b* Average values of the two **1–** moieties.

*c* Average values of the three **1–** moieties.

*d* Average of three bis(trifluoromethyl)pyrazolyl residues in a trispyrazolylborate.

*e* Average of two bis(trifluoromethyl)pyrazolyl residues in a bispyrazolylborate.

*f* Average of four bis(trifluoromethyl)pyrazolyl residues in a bispyrazolylborate.
